# Supplementary material
Source: publisher site journal article supplement (https://www.dovepress.com/article/384436)
Supplement: Supplementary file 1 [file get_supplementary_file.php]

**Supplementary Table 1:** AUA Urology Care Foundation Overactive Bladder Assessment Tool (AUA-OAB-tool)

| SYMPTOMS QUESTIONS | Not at all | Occasionally | About once a day | About three times a day | About half the time | Almost always | SCORE |
| --- | --- | --- | --- | --- | --- | --- | --- |
| 1. Urgency- How often do you have a strong, sudden urge to urinate that makes you fear that you will leak urine if you can’t get to a bathroom immediately? | 0* | 1 | 2 | 3 | 4 | 5 |  |
| 1. Urgency incontinence-How often do you leak urine after feeling a strong urge to go? (whether you wear pads/protection or not) | 0 | 1 | 2 | 3 | 4 | 5 |  |
|  | None | Drops | 1 tea-spoon | 1 table spoon | ¼ cup | Entire bladder |  |
| 1. Incontinence- How much urine do you think usually leaks? (whether you wear pads/protection or not) | 0 | 1 | 2 | 3 | 4 | 5 |  |
|  | 1-6 times | 7-8 times | 9-10 times | 11-12 times | 13-14 times | 15 or more |  |
| 1. Frequency-How often do you urinate during the day? | 0 | 1 | 2 | 3 | 4 | 5 |  |
|  | none | 1 time | 2 times | 3 times | 4 times | 5 times or more |  |
| 1. Waking to urinate-How many times do you usually get up at night to urinate, from when you went to bed until you get up in the morning? | 0 | 1 | 2 | 3 | 4 | 5 |  |
| TOTAL SYMPTOM SCORE | Add score from questions 1+2+3+4+5 | | | | | |  |

*If you score 0 on question 1, you probably don’t have OAB.

0= NO SYMPTOMS, 5= MOST SEVERE SYMPTOMS

| QUALITY OF LIFE QUESTIONS  How much does this bother you: | I am not bothered at all |  |  |  |  | I am bothered a great deal |
| --- | --- | --- | --- | --- | --- | --- |
| 1b Urgency- A strong sudden urge to urinate that makes you fear you will leak urine if you can’t get to a bathroom immediately? | 0 | 1 | 2 | 3 | 4 | 5 |
| 2b Urgency incontinence-leaking after feeling an urge to go? | 0 | 1 | 2 | 3 | 4 | 5 |
| 3b Frequency- urinating frequently | 0 | 1 | 2 | 3 | 4 | 5 |
| 4b waking from the sleep to urinate? | 0 | 1 | 2 | 3 | 4 | 5 |
|  | I would not be bothered at all |  |  |  |  | I would be bothered a great deal |
| 5b Overall satisfaction- If you were to spend the rest of your life with your urinary condition the way it is now, how would you feel about that? | 0 | 1 | 2 | 3 | 4 | 5 |
| 6b How have your symptoms change your life? - How have your symptoms (urgency, frequency, urine leakage, and waking at night) changed your life? Are your symptoms:  (Please check all that apply) | | | | | | |
| Keeping you from getting a good night’s sleep? | | | | | | |
| Causing you to stay home more than you would like? | | | | | | |
| Keeping you from social activities and entertainment? | | | | | | |
| Causing you to exercise less or limit your physical activity? | | | | | | |
| Causing problems with friends or loved ones? | | | | | | |
| Keeping you from travelling, taking trips, or using public transit? | | | | | | |
| Making you plan trips around your knowledge of public restroom location? | | | | | | |
| Causing problems at work? | | | | | | |
| Other ways your symptoms have changed your life | | | | | | |
